# Supplementary material for: Environmental enrichment implies GAT-1 as a potential therapeutic target for stroke recovery
Source: Theranostics. 2021 Jan 27;11(8):3760–80. doi: 10.7150/thno.53316 (PMC7914370; doi:10.7150/thno.53316)
Supplement: Supplementary file 1 — Supplementary figures. [file thnov11p3760s1.pdf]

## Supplementary Figures

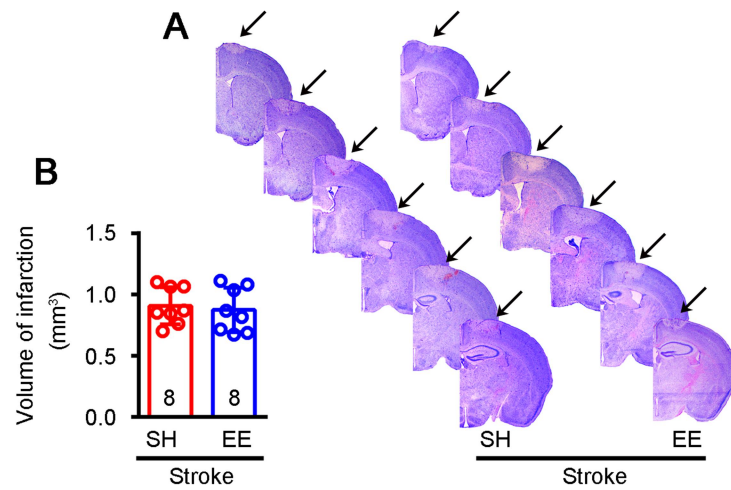

**Figure S1. EE exposure 5–11 days after stroke has no effect on infarct size.**

**(A)** Representative Nissl-stained sections 12 days after stroke from Stroke + SH and Stroke + EE mice. **(B)** Bar graph showing stroke volume in Stroke + SH and Stroke + EE mice. Two tailed  $t$ -test,  $F_{(1,14)} = 0.16$ . EE, environmental enrichment; SH, standard housing.

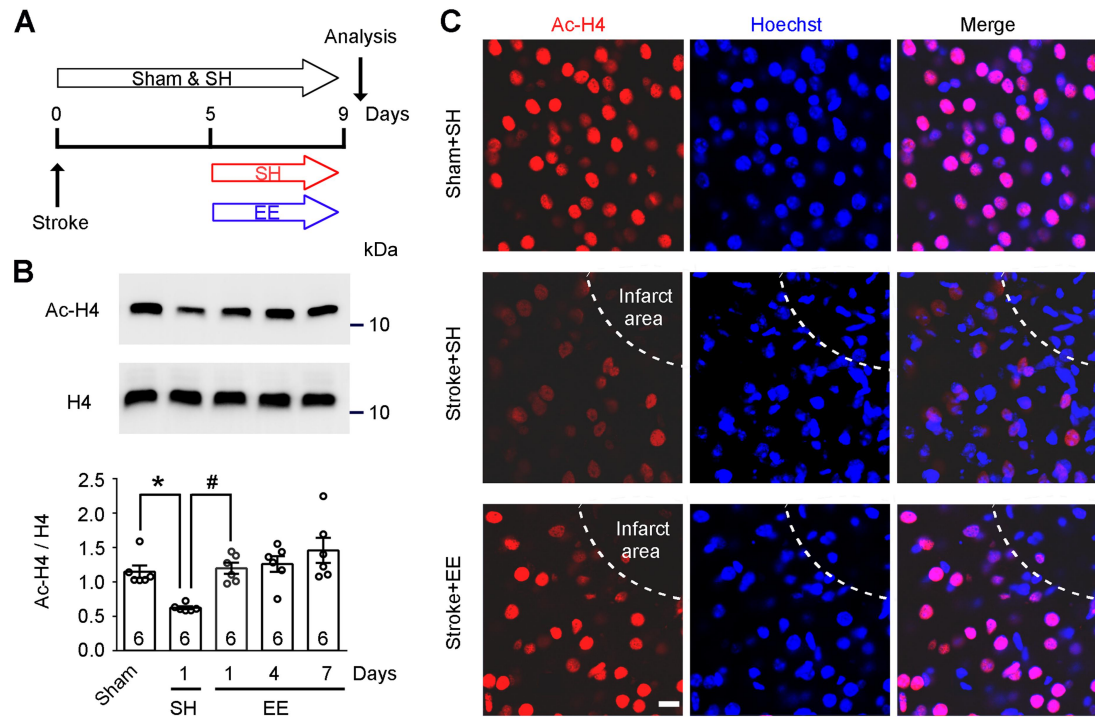

**Figure S2. EE exposure induces chromatin modifications in the peri-infarct area.**

**(A)** Experimental design for **(C)**. **(B)** Representative immunoblots and bar graph showing the time course of acetyl-H4 levels in the peri-infarct cortex. Mice were exposed to SH or EE 5 days after stroke. One-way ANOVA followed by post hoc Scheffe test,  $F_{(4,25)} = 7.81$ ,  $^*p = 0.048$ ,  $^{\#}p = 0.025$ . **(C)** Representative immunofluorescence images showing acetyl-H4 in the peri-infarct cortex. Scale bar, 20  $\mu\text{m}$ . EE, environmental enrichment; SH, standard housing.

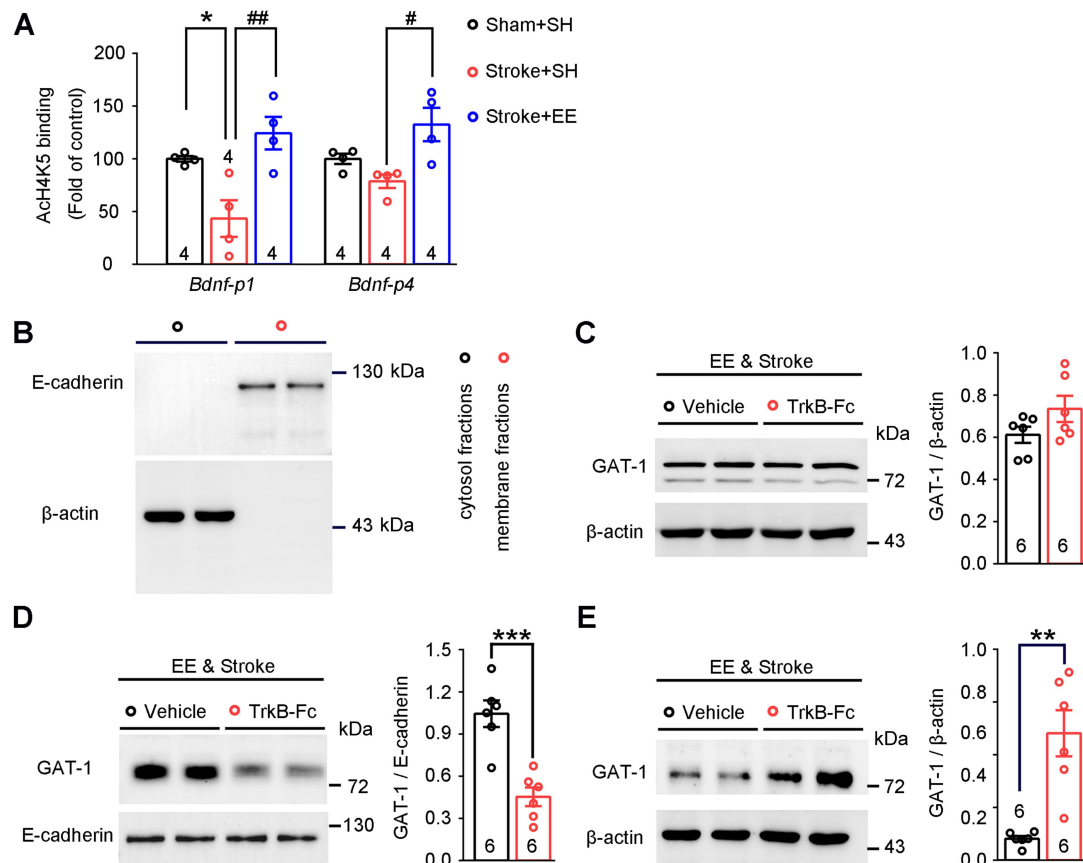

**Figure S3. EE exposure primes a transcriptional program for the expression of BDNF, which regulates trafficking of GAT-1.**

(A) Bar graph showing changes in histone acetylation in the promoter regions of BDNF genes in peri-infarct tissue. Fragmented chromatin was immunoprecipitated with antibody recognizing acetyl-H4 and quantified with real-time polymerase chain reaction. One-way ANOVA followed by post hoc Scheffe test. For *Bdnf-p1*,  $F_{(2,9)} = 9.44$ ,  $*p = 0.047$ ,  $^{##}p = 0.007$ ; for *Bdnf-p4*,  $F_{(2,9)} = 7.01$ ,  $^{#}p = 0.015$ . (B) Confirmation of the membrane protein fractions extraction method. Representative immunoblots showing that β-actin was exclusively detected in cytosol fractions, while E-cadherin was exclusively detected in membrane fractions. (C) Representative immunoblots and

bar graph showing GAT-1 content in peri-infarct cortex. Two-tailed  $t$ -test,  $F_{(1,10)} =$   
2.82. **(D)** Representative immunoblots and bar graph showing GAT-1 content in  
membrane fraction. Two-tailed  $t$ -test,  $F_{(1,10)} = 25.96$ , \*\*\* $p < 0.001$ . **(E)** Representative  
immunoblots and bar graph showing GAT-1 content in cytosol fractions. Two-tailed  
 $t$ -test,  $F_{(1,10)} = 20.58$ , \*\* $p = 0.001$ . BDNF, brain-derived neurotrophicfactor.

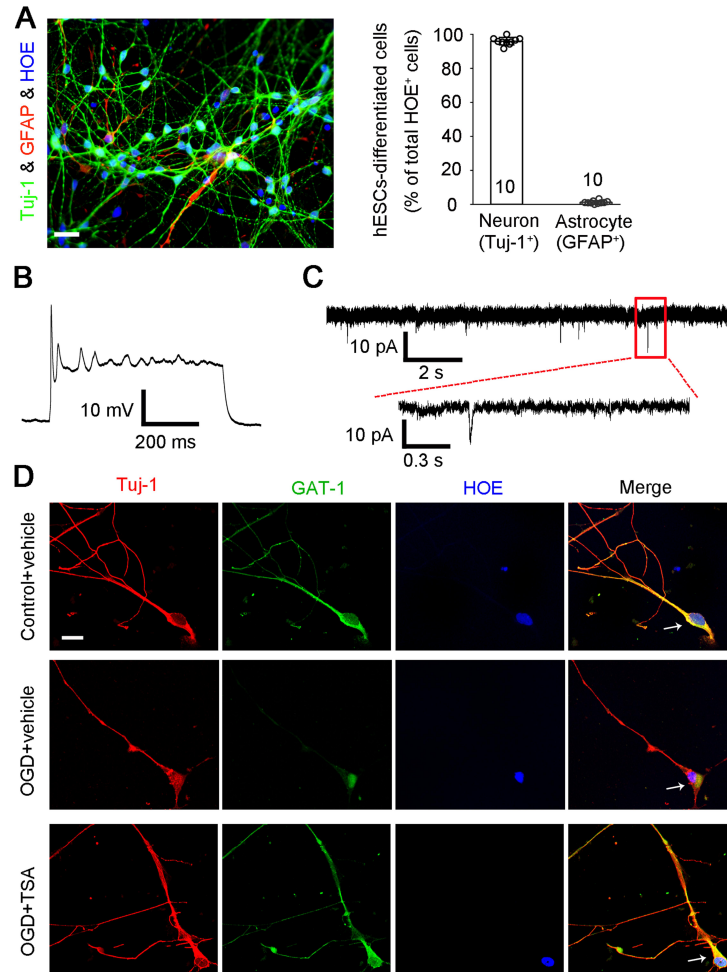

**Figure S4. TSA reverses OGD-induced internalization of GAT-1 in hESCs-derived neurons.**

(A) Representative fluorescence image and bar graph showing the percentage of neurons and astrocytes in hESCs-derived cells. Scale bar, 40  $\mu$ m. (B) Representative whole-cell patch clamp trace illustrating the number of APs in hESCs-derived neurons evoked by current injection. (C) Representative voltage clamp ( $-70$  mV) traces showing hESCs-derived neurons displaying spontaneous postsynaptic currents. (D) hESCs-derived neurons were exposed to 3 h of OGD. TSA ( $0.5$   $\mu$ M) was applied for 24 h, starting 24 h after OGD. Representative fluorescence images showing TuJ-1 and

75 GAT-1 in hESCs-derived neurons at 48 h after OGD. Scale bar, 20  $\mu$ m. AP, action  
76 potential; hESC, human embryonic stem cell; OGD, oxygen glucose deprivation; TSA,  
77 trichostatin A.

78

79

80

81

82

83

84

85

86

87

88

89

90

91

92

93

94

95

96

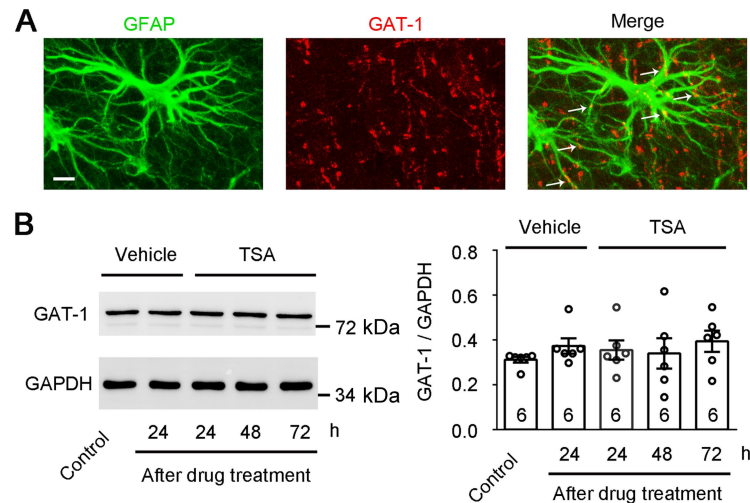

**Figure S5. OGD and TSA treatment have no effect on the expression of GAT-1 in astrocytes.**

**(A)** Representative fluorescence image showing GFAP (an astrocyte marker) and GAT-1 in the peri-infarct area. Arrows indicate GAT-1 co-localized with astrocytes. Scale bar, 20  $\mu$ m. **(B)** Cultured astrocytes were exposed to 3 h of OGD. TSA (0.5  $\mu$ M) was applied for 24, 48, and 72 h, starting 24 h after OGD. Immunoblots showing the time course of GAT-1 levels in cultured astrocytes after OGD exposure and TSA treatment. Bar graph showing the time course of GAT-1 levels in astrocytes after OGD exposure and TSA treatment. One-way ANOVA followed by post hoc Scheffe test,  $F_{(4,25)} = 0.49$ . OGD, oxygen glucose deprivation; TSA, trichostatin A.

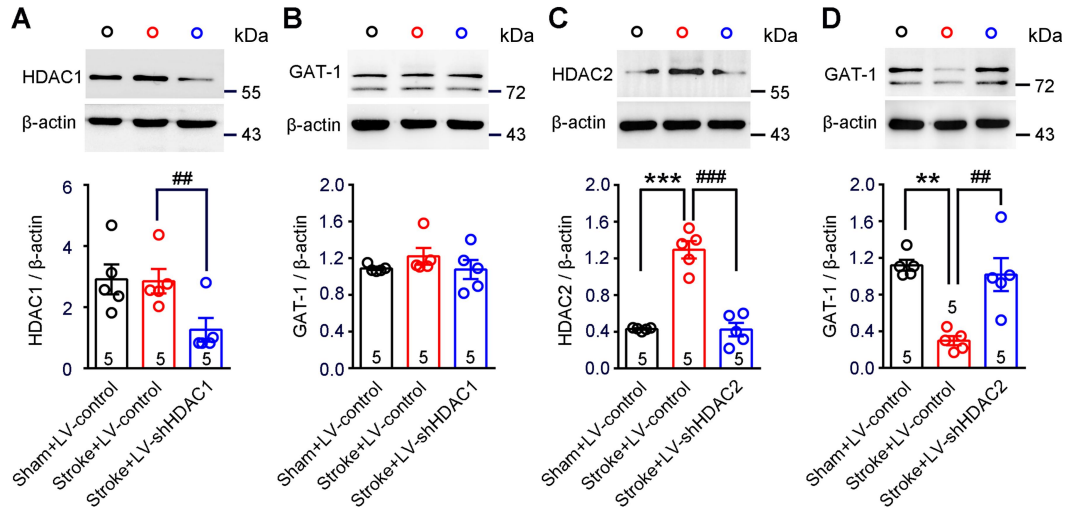

**Figure S6. HDAC2 but not HDAC1 negatively regulates GAT-1 expression.**

(A) Representative immunoblots and bar graph showing HDAC1 content in the peri-infarct cortex 5 days after stroke. One-way ANOVA followed by post hoc Scheffe test,  $F_{(2,12)} = 10.18$ ,  $^{##}p = 0.008$ . (B) Representative immunoblots and bar graph showing GAT-1 content in the peri-infarct cortex 5 days after stroke. One-way ANOVA followed by post hoc Scheffe test,  $F_{(2,12)} = 1$ . (C) Representative immunoblots and bar graph showing HDAC2 content in the peri-infarct cortex 5 days after stroke. One-way ANOVA followed by post hoc Scheffe test,  $F_{(2,12)} = 52.41$ ,  $^{***}p < 0.001$ ,  $^{###}p < 0.001$ . (D) Representative immunoblots and bar graph showing GAT-1 content in the peri-infarct cortex 5 days after stroke. One-way ANOVA followed by post hoc Scheffe test,  $F_{(2,12)} = 15.75$ ,  $^{**}p = 0.001$ ,  $^{##}p = 0.003$ . HDAC, histone deacetylase.

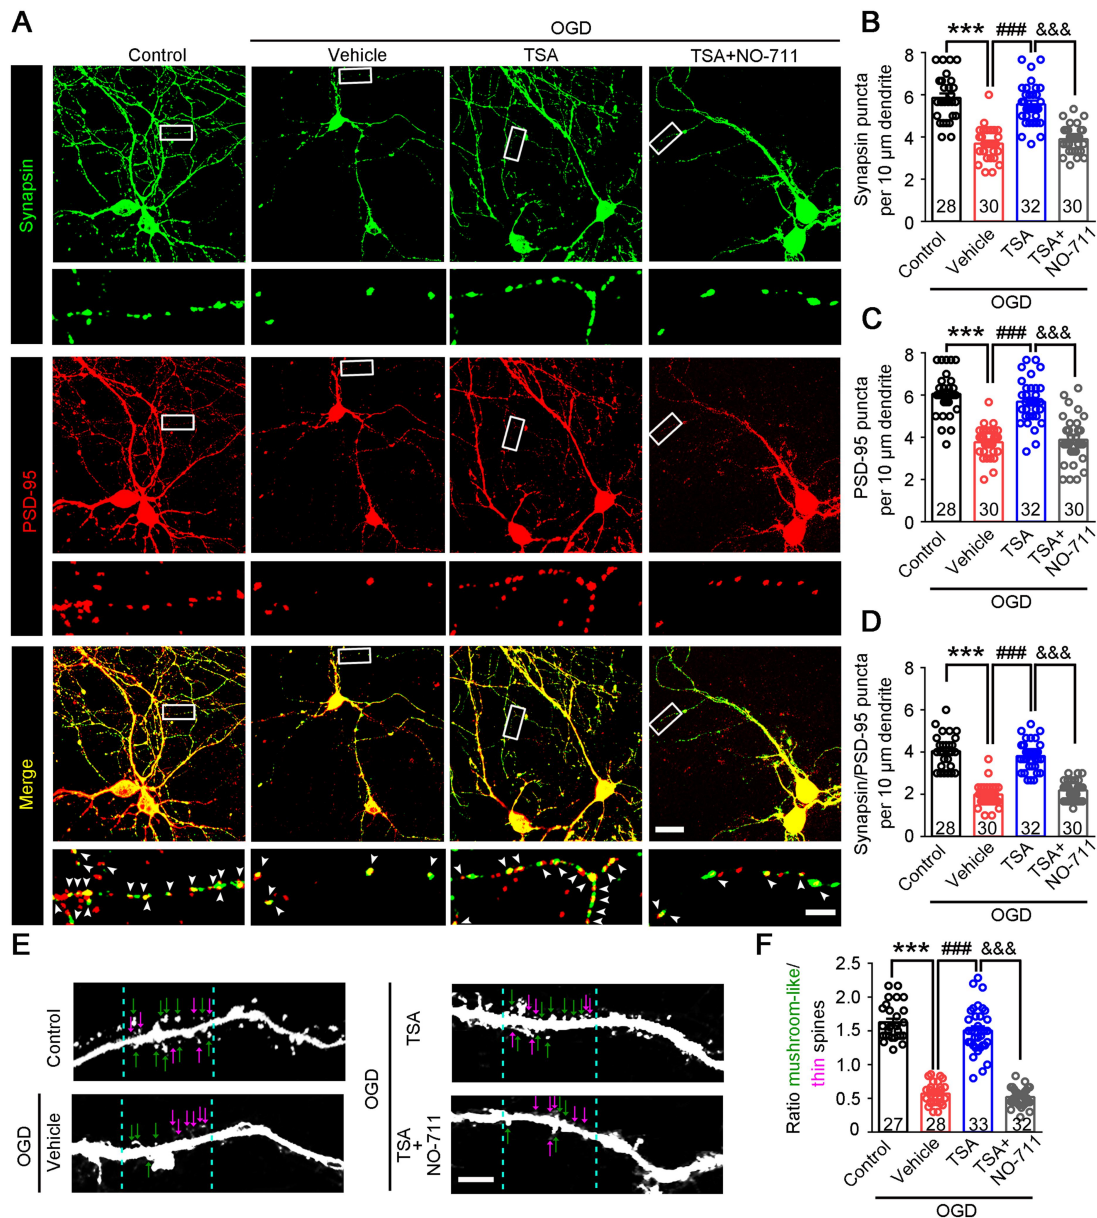

**Figure S7. GAT-1 is critical for the TSA-mediated increase in dendritic spine density and synaptogenesis after hypoxia.**

(A) Primary cultured mouse cortical neurons were exposed to 3 h of OGD. TSA (0.5 μM) or a mixture of TSA (0.5 μM) and NO-711 (10 μM) was applied for 24 h, starting 24 h after OGD. Representative fluorescence image showing synapsin and PSD-95 in primary cultured mouse cortical neurons after OGD. Each lower panel is a magnified

selected area from the upper image showing dendritic spines. Arrows indicate synapsin / PSD-95 double-positive puncta. Upper scale bars, 20  $\mu\text{m}$ . Lower scale bars, 5  $\mu\text{m}$ . **(B)** Bar graph showing the average density of synapsin puncta in dendritic segments of primary cortical neurons of the indicated groups. One-way ANOVA followed by post hoc Scheffe test,  $F_{(3,116)} = 46.37$ ,  $***p < 0.001$ ,  $###p < 0.001$ ,  $***p < 0.001$ . n indicates the number of dendrites from 3 independent experiments. **(C)** Bar graph showing the average density of synapsin puncta in dendritic segments of primary cortical neurons with the indicated treatments. One-way ANOVA followed by post hoc Scheffe test,  $F_{(3,116)} = 40.74$ ,  $***p < 0.001$ ,  $###p < 0.001$ ,  $***p < 0.001$ . **(D)** Bar graph showing the average density of synapsin / PSD-95 colocalized puncta in dendritic segments of primary cortical neurons with the indicated treatments. One-way ANOVA followed by post hoc Scheffe test,  $F_{(3,116)} = 82.06$ ,  $***p < 0.001$ ,  $###p < 0.001$ ,  $***p < 0.001$ . **(E)** Representative images of primary cultured cortical neurons infected with LV-GFP showing the morphology at 48 h after OGD. Scale bar, 5  $\mu\text{m}$ . **(F)** Bar graph showing the ratio of mushroom-like spines versus thin spines in the indicated groups. One-way ANOVA followed by post hoc Scheffe test,  $F_{(3,116)} = 170.22$ ,  $***p < 0.001$ ,  $###p < 0.001$ ,  $***p < 0.001$ . n indicates the number of dendrites from 3 independent experiments. OGD, oxygen glucose deprivation; TSA, trichostatin A.

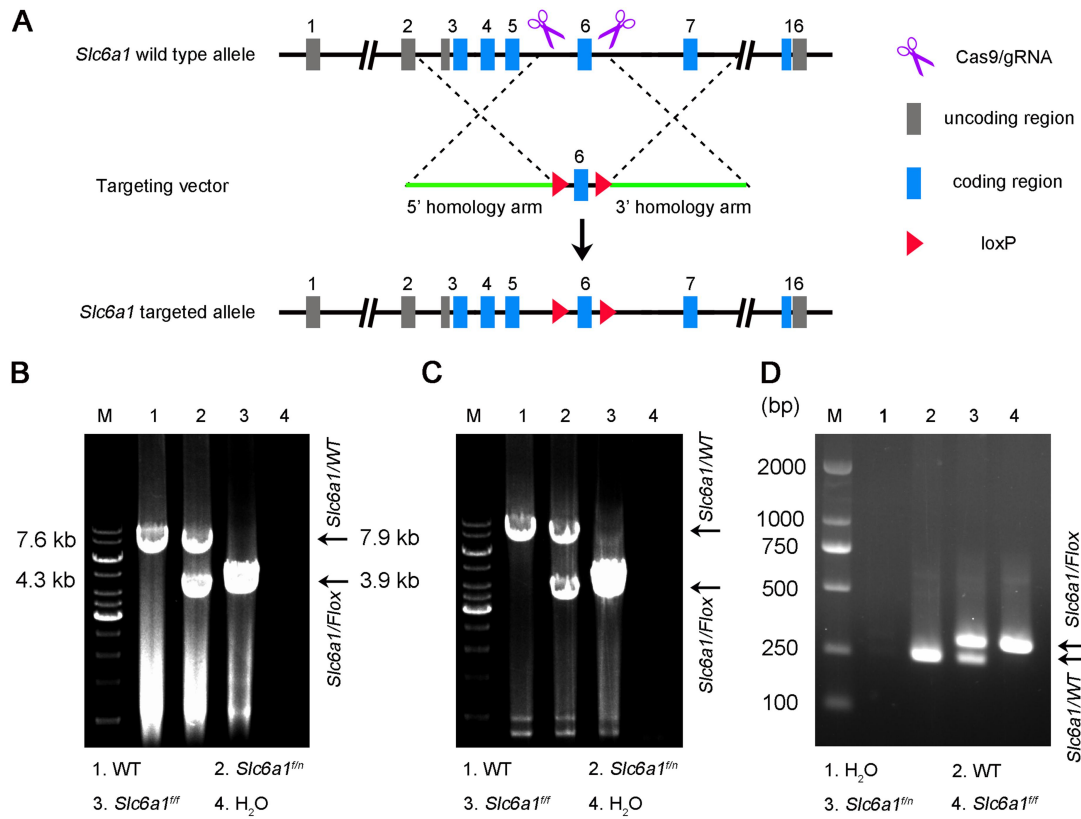

**Figure S8. Generation of GAT-1<sup>lox/flox</sup> mice.**

(A) Schematic illustration of the *Slc6a1* gene, targeting vector and the *Slc6a1* floxed locus. The *Slc6a1* gene has 16 exons, and exon 6 was floxed to generate GAT-1<sup>lox/flox</sup> mice. (B) ES clones with 5' arm homologous recombination were confirmed by PCR verification with a 4.3 kb band, while wild type generated a 7.6 kb band. (C) ES clones with 3' arm homologous recombination were confirmed by PCR verification with a 3.9 kb band, while wild type generated a 7.9 kb band. (D) Genotyping of GAT-1<sup>lox/flox</sup> mice. DNA was isolated for PCR with two primer pairs. The GAT-1 primers generated a 304 bp product in the loxP-flanked allele or a 246 bp product in the wild-type allele. M, marker; PCR, polymerase chain reaction.

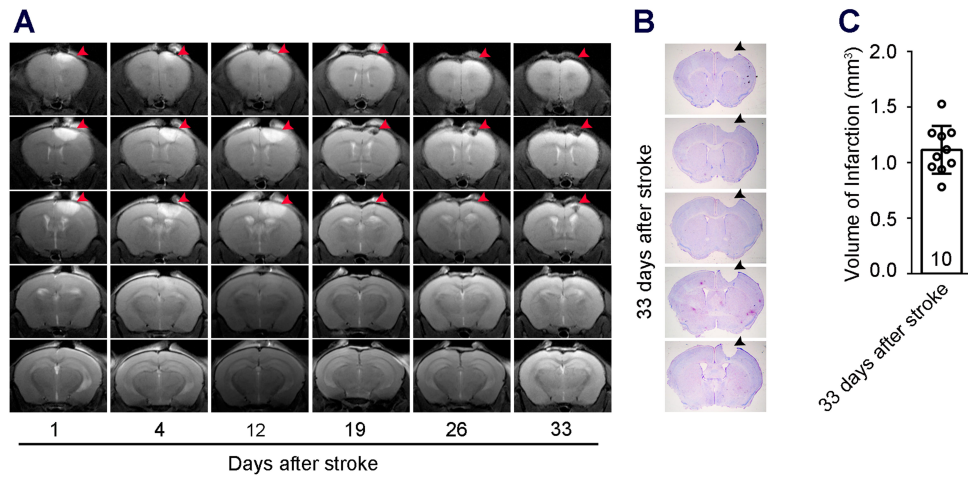

**Figure S9. Photothrombotic stroke model induces long-lasting motor cortex injury in adult mice.**

(A) Time course of representative T2-TurboRARE MRI of photothrombotic stroke mice. Arrows indicate the injured areas. (B) Representative Nissl-stained sections on day 33 after stroke. Arrows indicate the injured areas. (C) Bar graph showing stroke volume.

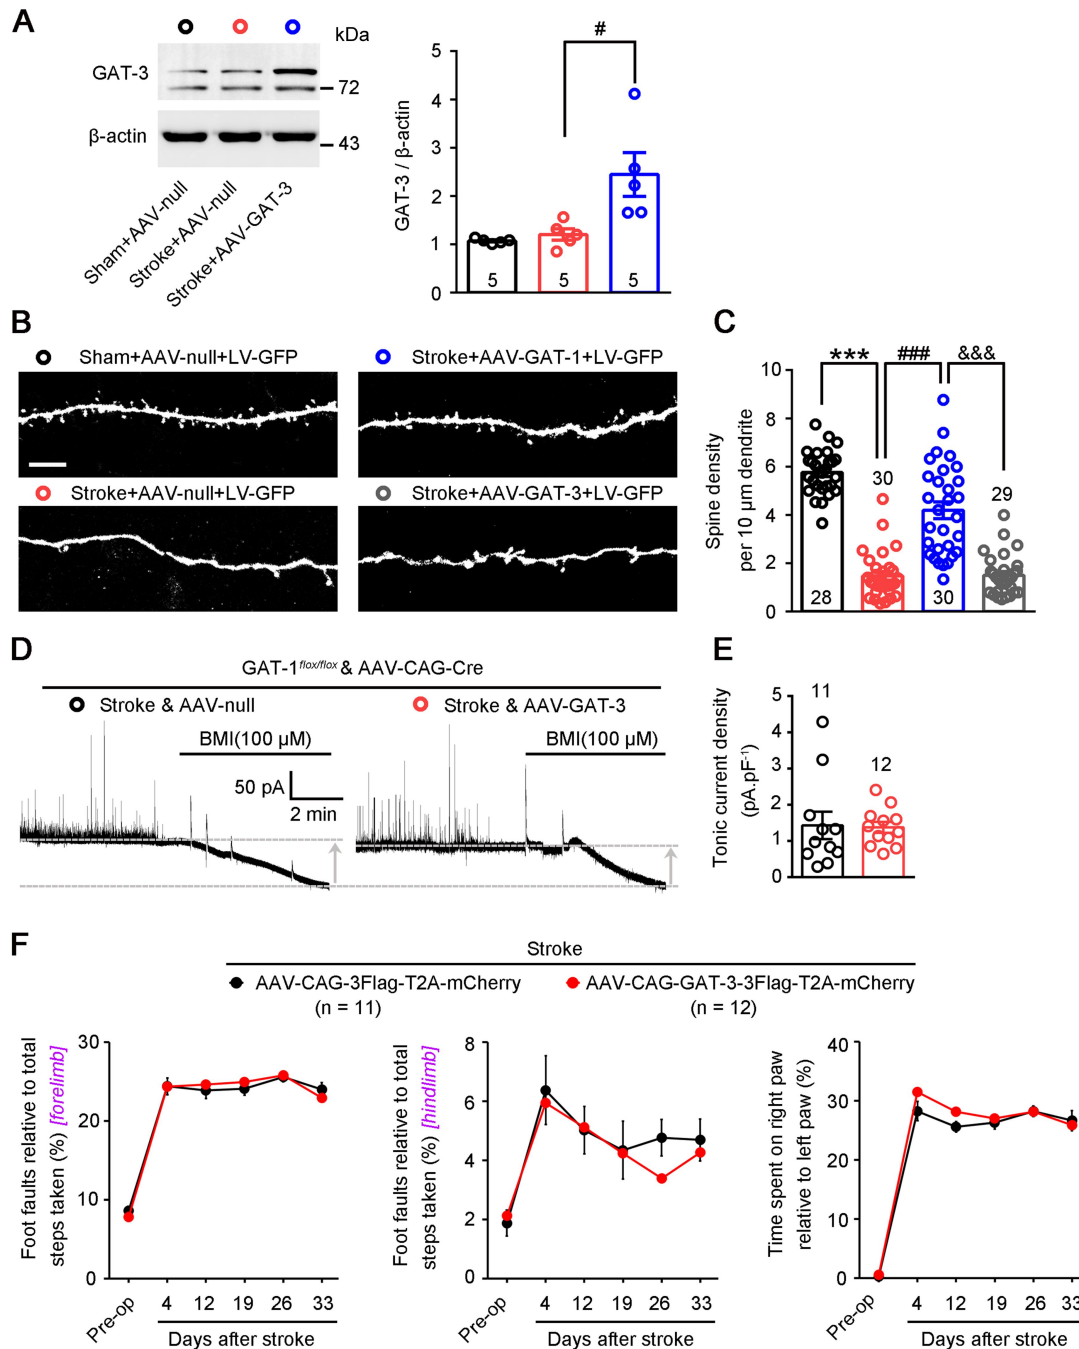

**Figure S10. GAT-1 but not GAT-3 overexpression promotes stroke recovery.**

(A) GAT-3 level in the peri-infarct cortex 8 days after AAV-CAG-3Flag-T2A-mcherry (AAV-null) or AAV-CAG-GAT-3-3Flag-T2A-mcherry (AAV-GAT-3) infection.

One-way ANOVA followed by post hoc Scheffe test,  $F_{(2,12)} = 7.87$ ,  $\#p = 0.023$ . (B)

Representative images showing the dendritic spines of peri-infarct neurons infected

with AAV-null, AAV-GAT-1 or AAV-GAT-3. For spine density analysis, only apical dendrites of layer 5 pyramidal neurons in the peri-infarct cortex (within 400  $\mu$ m from the infarct) were included. Scale bar, 5  $\mu$ m. **(C)** Bar graph showing spine densities of the indicated group. One-way ANOVA followed by post hoc Scheffe test,  $F_{(3,113)} = 83.71$ ,  $***p < 0.001$ ,  $###p < 0.001$ ,  $***p < 0.001$ . n indicates the number of dendrites from 3 independent experiments. **(D)** Representative traces showing tonic inhibitory currents recorded from layer 5 pyramidal neurons in AAV-null- or AAV-GAT-3-infected GAT-1 knockdown mice. **(E)** Bar graph showing tonic current density from layer 5 pyramidal neurons in AAV-null- or AAV-GAT-3-infected GAT-1 knockdown mice. Two-tailed  $t$ -test,  $F_{(1,21)} = 0.02$ . **(F)** Left, foot faults of the left forelimb in the grid-walking task. Middle, foot faults of the left hindlimb in the grid-walking task. Right, forelimb symmetry in the cylinder task. Two-way repeated-measures ANOVA followed by post hoc Bonferroni test. Left,  $F_{(1,22)} = 0.001$ . Middle,  $F_{(1,22)} = 0.353$ . Right,  $F_{(1,22)} = 1.537$ . AAV, adeno-associated virus; BMI, bicuculline methiodide.
